# Supplementary material for: Encapsulation and removal of aniline by di-cyclohexanocucurbit[6]uril
Source: Royal Society of Chemistry journal article supplement (doi:10.1039/c8nj05298k), 2018-12-12
Supplement: c8nj05298k1.pdf [file c8nj05298k1.pdf]

## Electronic Supplementary Information (ESI)

### Encapsulation and removal of aniline by di-cyclohexanocucurbit[6]uril

Mingli Zhang,<sup>a</sup> Hao Shi,<sup>b</sup> Di Meng,<sup>b</sup> Kai Chen,<sup>\*c</sup> Rui-Lian Lin,<sup>b</sup> Wen-Qi Sun,<sup>b</sup> and Jing-Xin Liu<sup>\*b</sup>

---

<sup>a</sup> Jiangsu Provincial Key Laboratory of Materials Cycling and Pollution Control, Nanjing Normal University (NNU), Nanjing 210023, China

<sup>b</sup> College of Chemistry and Chemical Engineering, Anhui University of Technology, Maanshan 243002, China. Email: jxliu411@163.com

<sup>c</sup> Jiangsu Key Laboratory of Atmospheric Environment Monitoring and Pollution Control, School of Environmental Science and Engineering, Nanjing University of Information Science & Technology, Nanjing 210044, P. R. China. Email: catqchen@163.com

#### Table of Contents

|                                                                                              |             |
|----------------------------------------------------------------------------------------------|-------------|
| <b>Figure S1: <sup>1</sup>H NMR of the guest 1<sup>+</sup> binding with the Cy6Q[6].....</b> | <b>2</b>    |
| <b>Figure S2: <sup>1</sup>H NMR of the guests 2<sup>+</sup> binding with Cy6Q[6].....</b>    | <b>3</b>    |
| <b>Figure S3: <sup>1</sup>H NMR of the guest 3<sup>2+</sup> binding with Cy6Q[6].....</b>    | <b>4</b>    |
| <b>Figure S4: The chemical shifts and splitting of the Cy2Q[6] protons.....</b>              | <b>5</b>    |
| <b>Figure S5-S7: ORTEP diagram of the compounds 1-3.....</b>                                 | <b>6-8</b>  |
| <b>Figure S8-S10: <sup>1</sup>H NMR of the compounds 1-3 .....</b>                           | <b>9-11</b> |

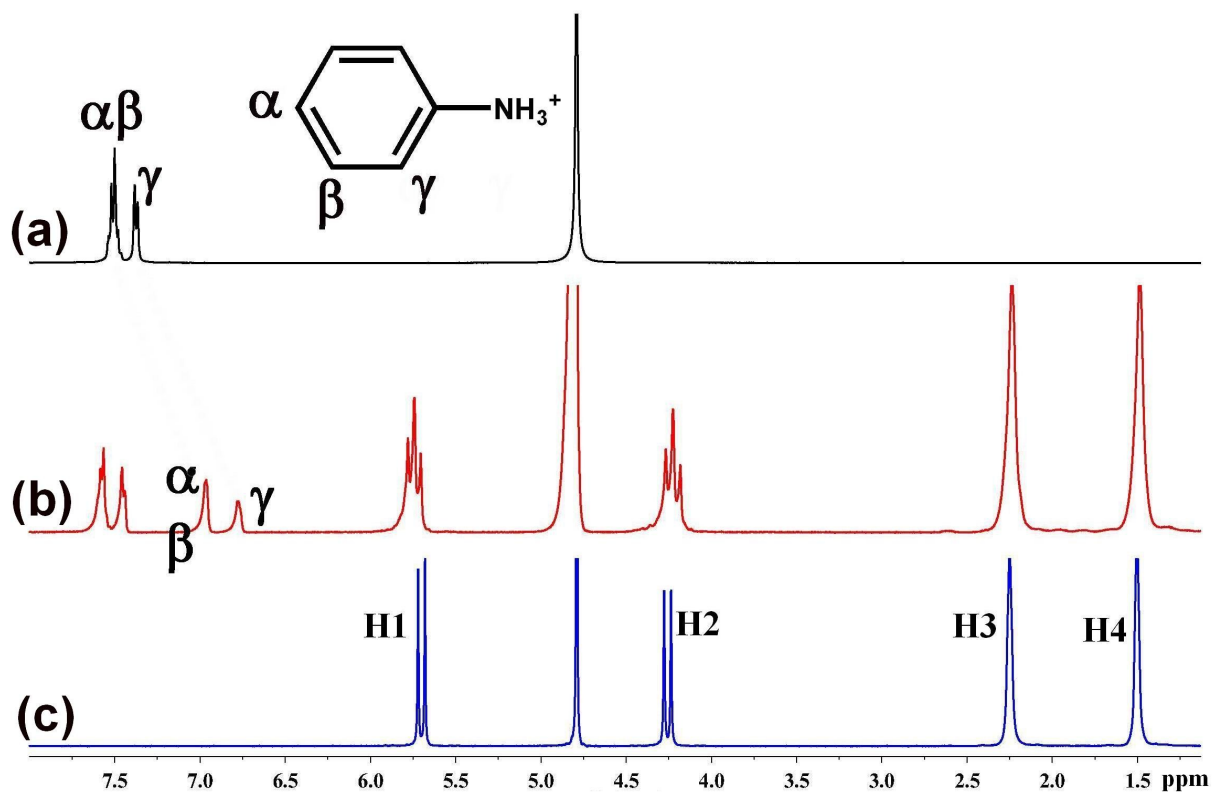

Figure S1.  $^1\text{H}$  NMR spectra (400 MHz) of guest  $1^+$  (2.0 mM) in absence (a) and presence of 0.37 (b) equiv of Cy6Q[6] in  $\text{D}_2\text{O}$  at  $20\text{ }^\circ\text{C}$ . (c) shows the  $^1\text{H}$  NMR spectrum (400 MHz) of Cy6Q[6] (2.0 mM) in 0.50 ml  $\text{D}_2\text{O}$  at  $20\text{ }^\circ\text{C}$ .

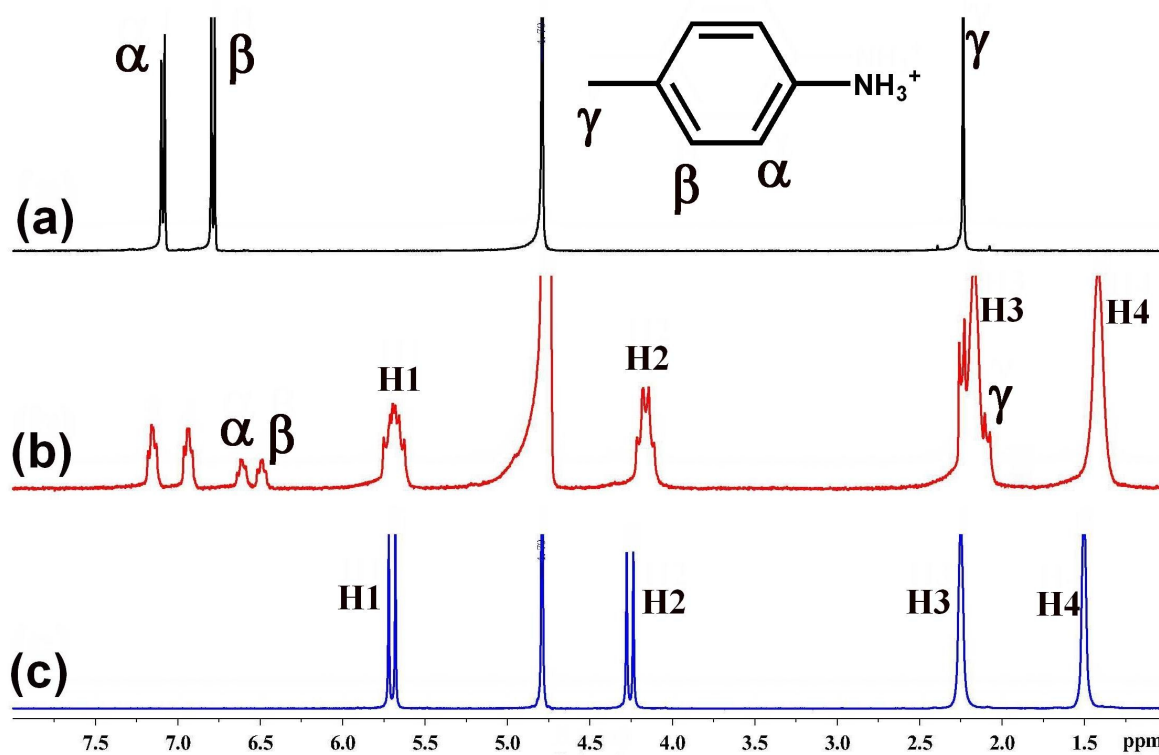

Figure S2.  $^1\text{H}$  NMR spectra (400 MHz) of guest  $2^+$  (2.0 mM) in absence (a) and presence of 0.32 (b) equiv of Cy6Q[6] in  $\text{D}_2\text{O}$  at 20  $^\circ\text{C}$ . (c) shows the  $^1\text{H}$  NMR spectrum (400 MHz) of Cy6Q[6] (2.0 mM) in 0.50 ml  $\text{D}_2\text{O}$  at 20  $^\circ\text{C}$ .

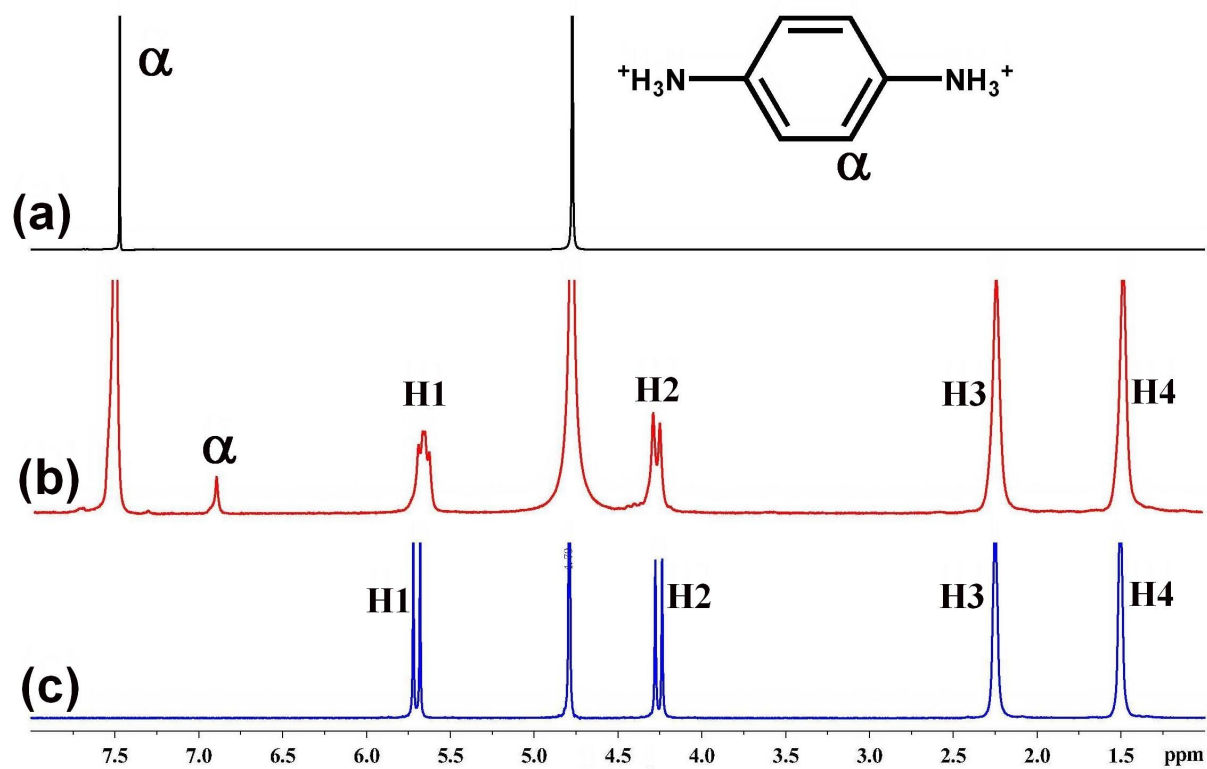

Figure S3.  $^1\text{H}$  NMR spectra (400 MHz) of guest  $3^{2+}$  (2.0 mM) in absence (a) and presence of 0.12 (b) equiv of Cy6Q[6] in  $\text{D}_2\text{O}$  at  $20^\circ\text{C}$ . (c) shows the  $^1\text{H}$  NMR spectrum (400 MHz) of Cy6Q[6] (2.0 mM) in 0.50 ml  $\text{D}_2\text{O}$  at  $20^\circ\text{C}$ .

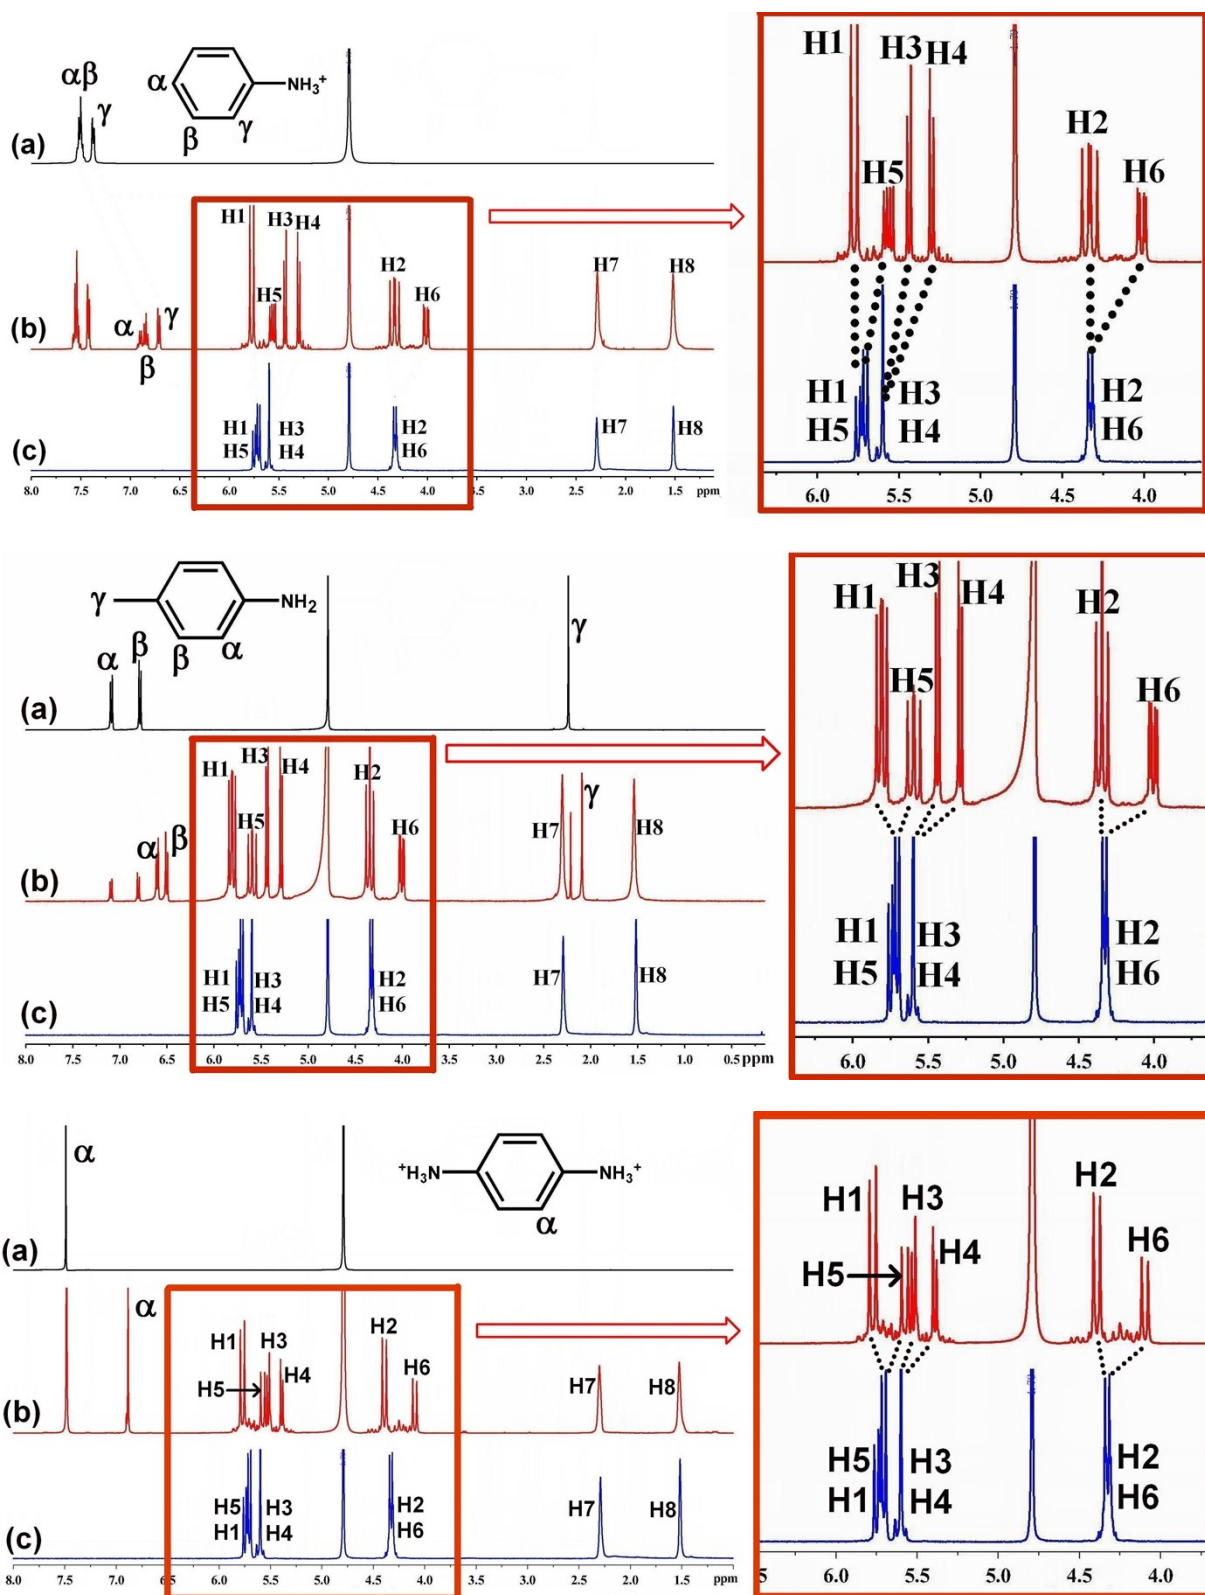

Figure S4. The chemical shifts and splitting of the Cy2Q[6] protons.

1

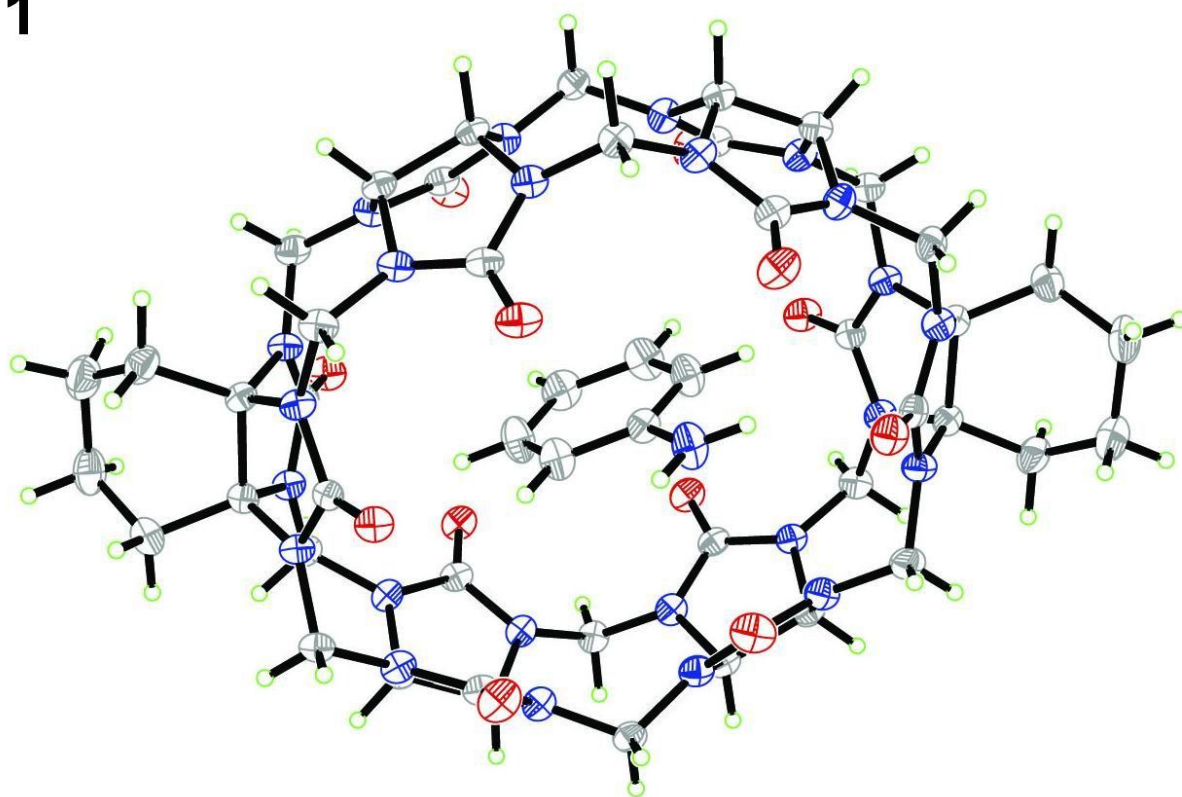

Figure S5. ORTEP diagram of the compound **1**; displacement ellipsoids are drawn at the 30% probability level. Solvate water molecules are omitted for clarity.

2

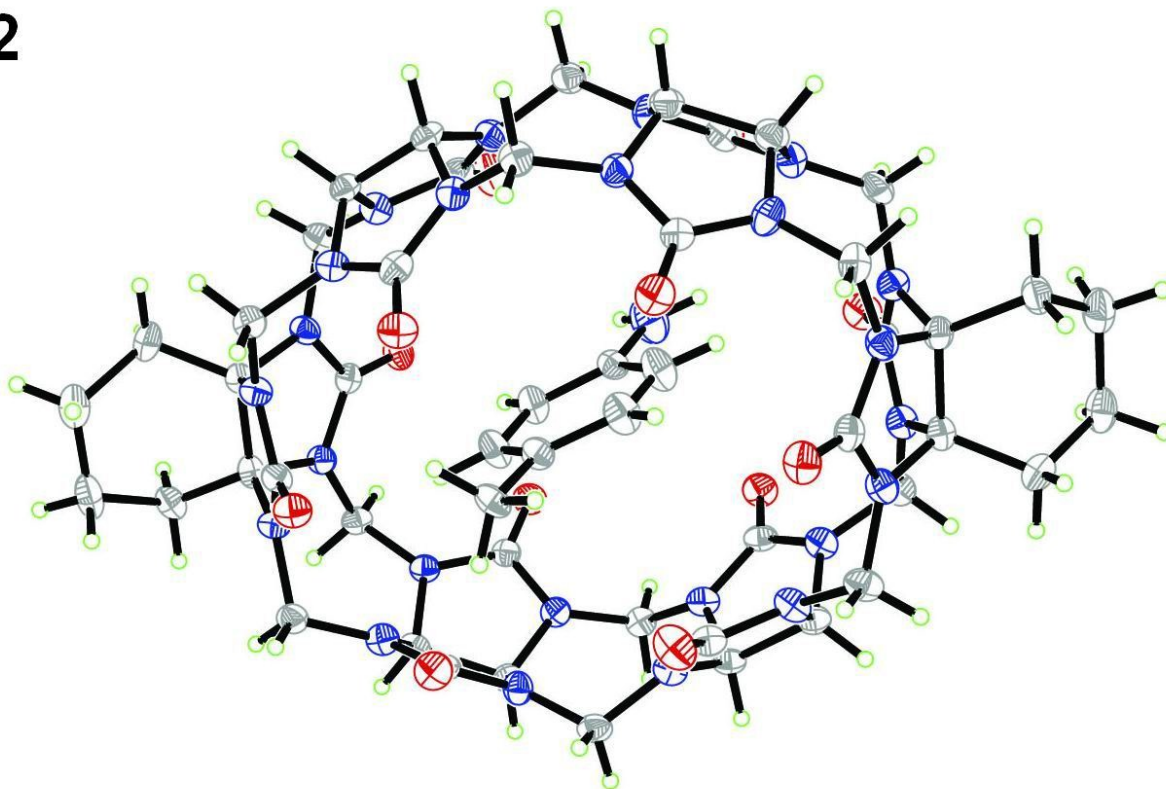

Figure S6. ORTEP diagram of the compound **2**; displacement ellipsoids are drawn at the 30% probability level. Solvate water molecules are omitted for clarity.

**3**

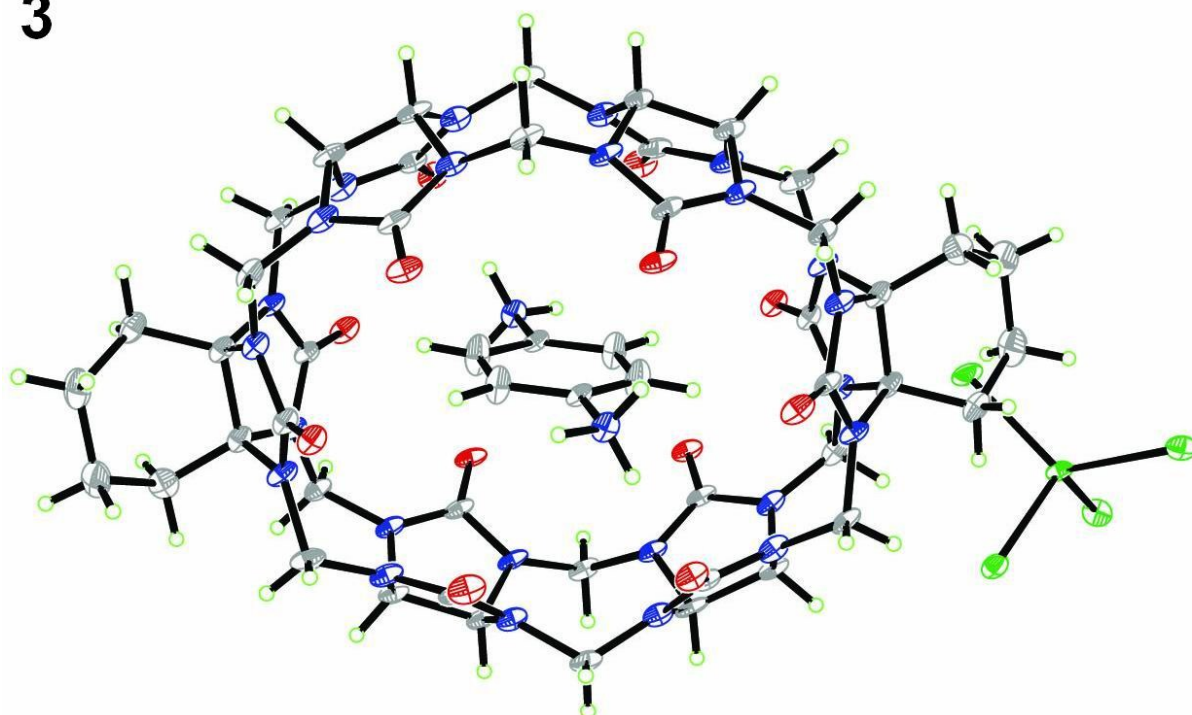

Figure S7. ORTEP diagram of the compound **3**; displacement ellipsoids are drawn at the 30% probability level. Solvate water molecules are omitted for clarity.



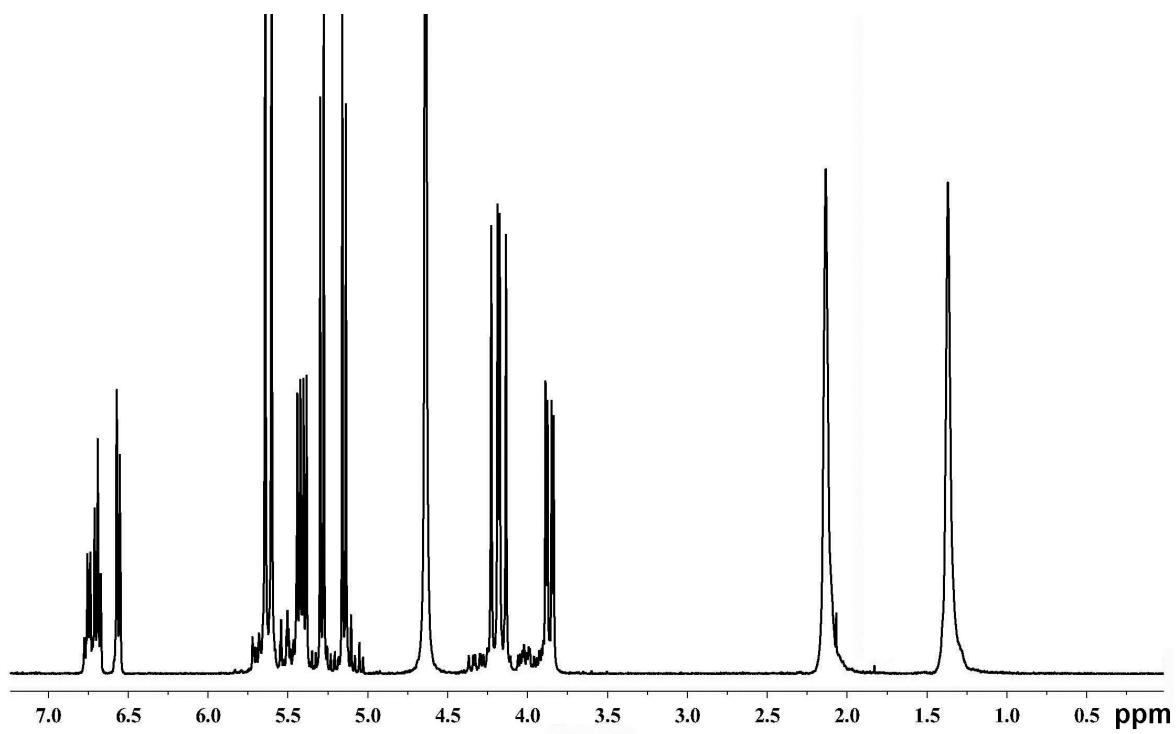

Figure S8. <sup>1</sup>H NMR spectrum of the compound **1** (2.0 mM) in D<sub>2</sub>O at 20 °C.

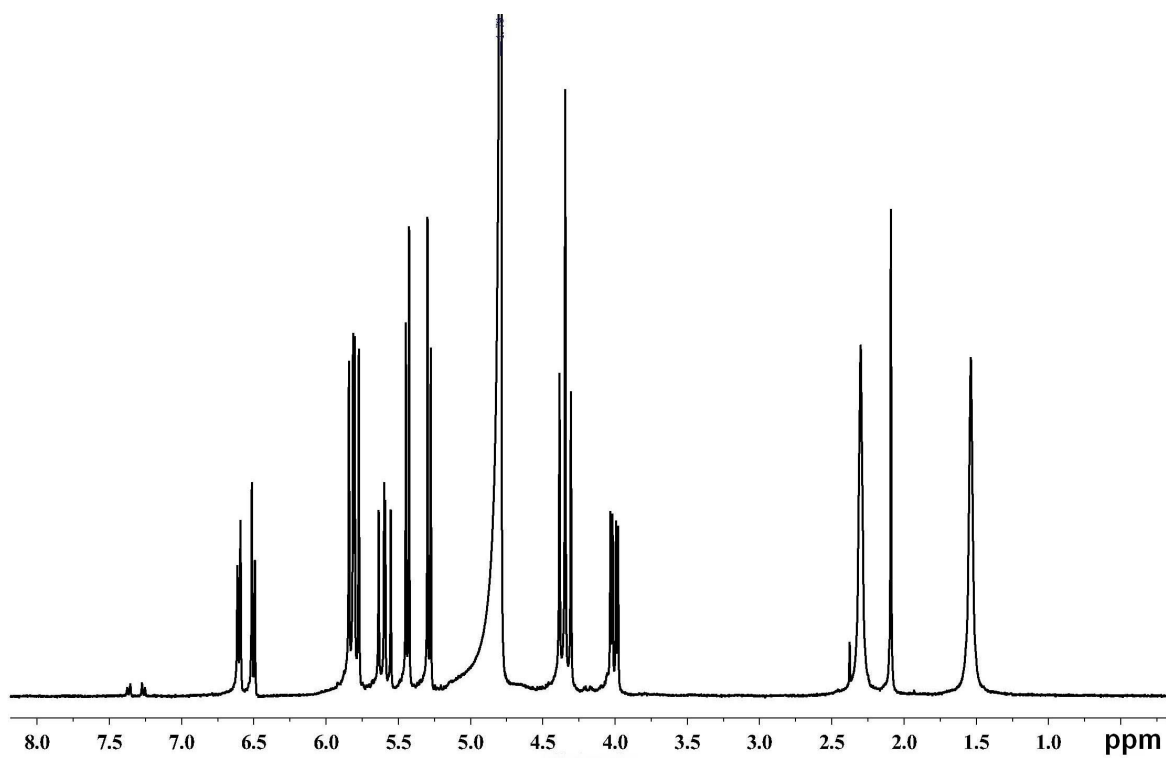

Figure S9. <sup>1</sup>H NMR spectrum of the compound **2** (2.0 mM) in D<sub>2</sub>O at 20 °C.

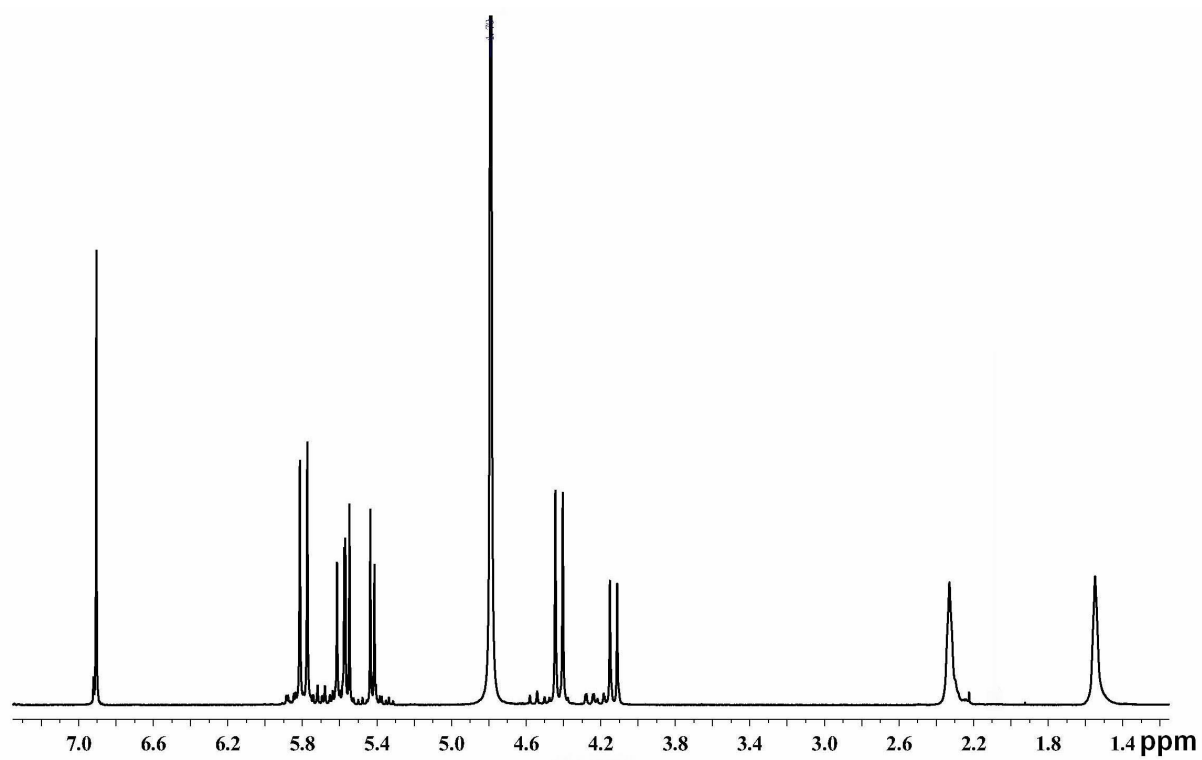

Figure S10.  $^1\text{H}$  NMR spectrum of the compound **3** (2.0 mM) in  $\text{D}_2\text{O}$  at  $20\text{ }^\circ\text{C}$ .
